# Supplementary material
Source: ML conference proceedings conference paper supplement (https://proceedings.neurips.cc/paper_files/paper/2017/hash/e655c7716a4b3ea67f48c6322fc42ed6-Abstract.html)
Supplement: Supplementary file [file e655c7716a4b3ea67f48c6322fc42ed6-Supplemental.zip]

---

# Multitask Spectral Learning of Weighted Automata (Supplementary Material)

---

Guillaume Rabusseau<sup>\*</sup>  
McGill University

Borja Balle<sup>†</sup>  
Amazon Research Cambridge

Joelle Pineau<sup>‡</sup>  
McGill University

## 1 Proofs

### 1.1 Proof of Theorem 3

**Theorem.** Let  $\vec{f} : \Sigma^* \rightarrow \mathbb{R}^d$  and let  $\mathcal{H}$  be the corresponding Hankel tensor. Then  $\text{rank}(f) = \text{rank}(\mathcal{H}_{(1)})$ .

*Proof.* We first show that  $\text{rank}(\vec{f}) \geq \text{rank}(\mathcal{H}_{(1)})$ . Let  $A = (\alpha, \{\mathbf{A}^\sigma\}_{\sigma \in \Sigma}, \Omega)$  be a vv-WFA with  $n$  states computing  $\vec{f}$  and let  $\mathbf{P} \in \mathbb{R}^{\Sigma^* \times n}$  and  $\mathcal{S} \in \mathbb{R}^{n \times d \times \Sigma^*}$  be defined by

$$\mathbf{P}_{u,:} = \alpha^\top \mathbf{A}^u \text{ and } \mathcal{S}_{:,v} = \mathbf{A}^v \Omega.$$

It is easy to check that  $\mathcal{H} = \mathcal{S} \times_1 \mathbf{P}$  which implies  $\mathcal{H}_{(1)} = \mathbf{P} \mathcal{S}_{(1)}$  and thus  $\text{rank}(\mathcal{H}_{(1)}) \leq n$ .

For the converse, we first define the notion of *residual functions* of  $\vec{f}$ : for any  $x \in \Sigma^*$  the residual  $\bar{x} : \Sigma^* \rightarrow \mathbb{R}^d$  is the function defined by  $\bar{x}(u) = \vec{f}(xu)$  for any  $u \in \Sigma^*$ . Let  $V = \{\bar{x} : x \in \Sigma^*\} \subset (\mathbb{R}^d)^{\Sigma^*}$  be the space of residual functions of  $f$ . Suppose that  $\text{rank}(\mathcal{H}_{(1)}) = n$ . Since each residual  $\bar{x}$  can be identified with the row vector  $(\mathcal{H}_{(1)})_{x,:}$ , the dimension of  $V$  is equal to  $n$ . Thus there exist  $n$  words  $e_1, \dots, e_n \in \Sigma^*$  such that  $(\bar{e}_1, \dots, \bar{e}_n)$  is a basis of  $V$ . Expressing  $\bar{\lambda}$  and  $\bar{e}_i \bar{\sigma}$  for each  $i \in [n]$ ,  $\sigma \in \Sigma$  in this basis, we know that there exist  $\alpha \in \mathbb{R}^n$  and  $\mathbf{A}^\sigma \in \mathbb{R}^{n \times n}$  for each  $\sigma$  such that

$$\bar{\lambda} = \sum_i \alpha_i \bar{e}_i \text{ and } \bar{e}_i \bar{\sigma} = \sum_j \mathbf{A}_{i,j}^\sigma \bar{e}_j.$$

We now show by induction on  $|x|$  that  $\bar{e}_i \bar{x} = \sum_j \mathbf{A}_{i,j}^x \bar{e}_j$  for any non-empty string  $x \in \Sigma^*$ . The case  $x = \sigma \in \Sigma$  is immediate by definition of  $\mathbf{A}^\sigma$ . Let  $x, y$  be two non-empty words, for any  $u \in \Sigma^*$  and any  $i \in [n]$  we get

$$\begin{aligned} \bar{e}_i \bar{xy}(u) &= \vec{f}(e_i xy u) = \bar{e}_i \bar{x}(yu) \\ &= \sum_j \mathbf{A}_{i,j}^x \bar{e}_j(yu) = \sum_j \mathbf{A}_{i,j}^x \vec{f}(e_j y u) = \sum_j \mathbf{A}_{i,j}^x \bar{e}_j \bar{y}(u) \\ &= \sum_j \mathbf{A}_{i,j}^x \sum_k \mathbf{A}_{j,k}^y \bar{e}_k(u) = \sum_k \mathbf{A}_{i,k}^{xy} \bar{e}_k(u) \end{aligned}$$

using the induction hypothesis twice. To conclude the proof, let  $\Omega \in \mathbb{R}^{n \times d}$  be the matrix with rows  $\bar{e}_i(\lambda)$  for  $i \in [n]$ . For any  $x \in \Sigma^*$  we have

$$\begin{aligned} \vec{f}(x) &= \bar{\lambda}(x) = \sum_i \alpha_i \bar{e}_i(x) = \sum_i \alpha_i \bar{e}_i \bar{x}(\lambda) \\ &= \sum_i \alpha_i \sum_j \mathbf{A}_{i,j}^x \bar{e}_j(\lambda) = \alpha^\top \mathbf{A}^x \Omega, \end{aligned}$$

---

<sup>\*</sup> guillaume.rabusseau@mail.mcgill.ca

<sup>†</sup> pigem@amazon.co.uk

<sup>‡</sup> jpineau@cs.mcgill.ca

showing that the vv-WFA  $(\alpha, \{\mathbf{A}^\sigma\}_{\sigma \in \Sigma}, \Omega)$  computes  $\vec{f}$  and consequently that  $\text{rank}(\vec{f}) \leq n = \text{rank}(\mathcal{H}_{(1)})$ .  $\square$

## 1.2 Proof of Corollary 4

**Corollary.** Let  $\vec{f} : \Sigma^* \rightarrow \mathbb{R}^d$  be a recognizable function with rank  $n$ , let  $\mathcal{H} \in \mathbb{R}^{\Sigma^* \times d \times \Sigma^*}$  be its Hankel tensor, and for each  $\sigma \in \Sigma$  let  $\mathcal{H}^\sigma \in \mathbb{R}^{\Sigma^* \times d \times \Sigma^*}$  be defined by  $\mathcal{H}_{u,::,v}^\sigma = f(u\sigma v)$  for all  $u, v \in \Sigma^*$ .

Then, for any  $\mathbf{P} \in \mathbb{R}^{\Sigma^* \times n}$  and  $\mathcal{S} \in \mathbb{R}^{n \times d \times \Sigma^*}$  such that  $\mathcal{H} = \mathcal{S} \times_1 \mathbf{P}$ , the vv-WFA  $A = (\alpha, \{\mathbf{A}^\sigma\}_{\sigma \in \Sigma}, \Omega)$  defined by  $\alpha^\top = \mathbf{P}_{\lambda,::}$ ,  $\Omega = \mathcal{S}_{::,\lambda}$ , and  $\mathbf{A}^\sigma = \mathbf{P}^\dagger \mathcal{H}_{(1)}^\sigma (\mathcal{S}_{(1)})^\dagger$  is a minimal vv-WFA computing  $\vec{f}$ .

*Proof.* Let  $\hat{A} = (\hat{\alpha}^\top, \{\hat{\mathbf{A}}^\sigma\}_{\sigma \in \Sigma}, \hat{\Omega})$  be a minimal vv-WFA computing  $\vec{f}$  and let  $\hat{\mathbf{P}} \in \mathbb{R}^{\Sigma^* \times n}$  and  $\hat{\mathcal{S}} \in \mathbb{R}^{n \times d \times \Sigma^*}$  be defined by

$$\hat{\mathbf{P}}_{u,::} = \alpha^\top \hat{\mathbf{A}}^u \text{ and } \hat{\mathcal{S}}_{::,v} = \hat{\mathbf{A}}^v \Omega, \quad u, v \in \Sigma^*,$$

hence  $\mathcal{H} = \hat{\mathcal{S}} \times_1 \hat{\mathbf{P}}$  and, equivalently,  $\mathcal{H}_{(1)} = \hat{\mathbf{P}} \hat{\mathcal{S}}_{(1)}$ . We will show that  $\alpha^\top = \hat{\alpha}^\top \mathbf{M}^{-1}$ ,  $\Omega = \mathbf{M} \hat{\Omega}$  and  $\mathbf{A}^\sigma = \mathbf{M} \hat{\mathbf{A}}^\sigma \mathbf{M}^{-1}$  for each  $\sigma \in \Sigma$  where  $\mathbf{M} = \mathbf{P}^\dagger \hat{\mathbf{P}}$ , which will imply  $\vec{f}_A = \vec{f}_{\hat{A}} = \vec{f}$ .

To simplify the notations, let  $\mathbf{H} = \mathcal{H}_{(1)}$ ,  $\mathbf{S} = \mathcal{S}_{(1)}$ ,  $\hat{\mathbf{S}} = \hat{\mathcal{S}}_{(1)}$ , and  $\mathbf{H}^\sigma = (\mathcal{H}^\sigma)_{(1)}$  for each  $\sigma \in \Sigma$ . First observe that since  $\mathbf{P}^\dagger \hat{\mathbf{P}} \hat{\mathbf{S}} \hat{\mathbf{S}}^\dagger = \mathbf{P}^\dagger \mathbf{H} \mathbf{S}^\dagger = \mathbf{I}$ , the matrix  $\mathbf{M}$  is invertible with  $\mathbf{M}^{-1} = \hat{\mathbf{S}} \hat{\mathbf{S}}^\dagger$ . Using the identities  $\mathbf{H}^\sigma = \hat{\mathbf{P}} \hat{\mathbf{A}}^\sigma \hat{\mathbf{S}}$ ,  $\mathbf{H}_{\lambda,::} = \hat{\alpha}^\top \hat{\mathbf{S}}$ ,  $\mathbf{P}^\dagger \mathcal{H}_{::,\lambda} = \mathcal{S}_{::,\lambda}$ , and  $\mathcal{H}_{::,\lambda} = \hat{\mathbf{P}} \hat{\Omega}$ , we then get

$$\begin{aligned} \mathbf{A}^\sigma &= \mathbf{P}^\dagger \mathbf{H}^\sigma \mathbf{S}^\dagger = \mathbf{P}^\dagger \hat{\mathbf{P}} \hat{\mathbf{A}}^\sigma \hat{\mathbf{S}} \hat{\mathbf{S}}^\dagger = \mathbf{M} \hat{\mathbf{A}}^\sigma \mathbf{M}^{-1}, \\ \alpha^\top &= \mathbf{P}_{\lambda,::} = \mathbf{H}_{\lambda,::} \mathbf{S}^\dagger = \hat{\alpha}^\top \hat{\mathbf{S}} \hat{\mathbf{S}}^\dagger = \hat{\alpha}^\top \mathbf{M}^{-1}, \text{ and} \\ \Omega &= \mathcal{S}_{::,\lambda} = \mathbf{P}^\dagger \mathcal{H}_{::,\lambda} = \mathbf{P}^\dagger \hat{\mathbf{P}} \hat{\Omega} = \mathbf{M} \hat{\Omega}. \end{aligned} \quad \square$$

## 1.3 Proof of Proposition 1

**Proposition.** Let  $\vec{f} : \Sigma^* \rightarrow \mathbb{R}^d$  be a function computed by a vv-WFA  $A = (\alpha, \{\mathbf{A}^\sigma\}_{\sigma \in \Sigma}, \Omega)$  with  $n$  states and let  $\mathcal{P}, \mathcal{S} \subseteq \Sigma^*$  be a complete basis for  $\vec{f}$ . For any  $i \in [d]$ , let  $f_i : \Sigma^* \rightarrow \mathbb{R}$  be defined by  $f_i(x) = \vec{f}(x)_i$  for all  $x \in \Sigma^*$  and let  $n_i$  denote the rank of  $f_i$ .

Let  $\mathbf{P} \in \mathbb{R}^{\mathcal{P} \times n}$  be defined by  $\mathbf{P}_{x,::} = \alpha^\top \mathbf{A}^x$  for all  $x \in \mathcal{P}$  and, for  $i \in [d]$ , let  $\mathbf{H}_i = \mathbf{U}_i \mathbf{D}_i \mathbf{V}_i^\top$  be the thin SVD of  $\mathbf{H}_i$  (i.e.  $\mathbf{D}_i \in \mathbb{R}^{n_i \times n_i}$ ) where  $\mathbf{H}_i \in \mathbb{R}^{\mathcal{P} \times \mathcal{S}}$  is the hankel matrix of  $f_i$ .

Then, for any  $i \in [d]$ , the WFA  $A_i = \langle \alpha_i, \{\mathbf{A}_i^\sigma\}_{\sigma \in \Sigma}, \omega_i \rangle$  defined by

$$\alpha_i^\top = \alpha^\top \mathbf{P}^\dagger \mathbf{U}_i, \quad \omega_i = \mathbf{U}_i^\top \mathbf{P} \Omega_{:,i} \text{ and } \mathbf{A}_i^\sigma = \mathbf{U}_i^\top \mathbf{P} \mathbf{A}^\sigma \mathbf{P}^\dagger \mathbf{U}_i \text{ for each } \sigma \in \Sigma,$$

is a minimal WFA computing  $f_i$ .

*Proof.* For each  $i \in [d]$ , let  $\mathbf{S}_i \in \mathbb{R}^{n \times \mathcal{S}}$  be defined by  $(\mathbf{S}_i)_{:,x} = \mathbf{A}^x \Omega_{:,i}$  and consider the  $|\mathcal{P}| \times d|\mathcal{S}|$  block matrices  $\mathbf{H} = [\mathbf{H}_1, \dots, \mathbf{H}_d]$ ,  $\mathbf{H}^\sigma = [\mathbf{H}_1^\sigma, \dots, \mathbf{H}_d^\sigma]$  for each  $\sigma \in \Sigma$ , and  $\mathbf{S} = [\mathbf{S}_1, \dots, \mathbf{S}_d]$ .

We show the result for  $i = 1$ . First, it follows from applying Corollary 2 to the factorization  $\mathbf{H}_1 = \mathbf{U}_1 (\mathbf{D}_1 \mathbf{V}_1^\top)$  that the WFA  $\hat{A} = \langle \hat{\alpha}, \{\hat{\mathbf{A}}^\sigma\}_{\sigma \in \Sigma}, \hat{\omega} \rangle$  defined by

$$\hat{\alpha}^\top = (\mathbf{U}_1)_{\lambda,::}, \quad \hat{\omega} = (\mathbf{D} \mathbf{V}_1^\top)_{:, \lambda} \text{ and } \hat{\mathbf{A}}^\sigma = \mathbf{U}_1^\top \mathbf{H}_1^\sigma \mathbf{V}_1 \mathbf{D}_1^{-1} \text{ for each } \sigma \in \Sigma$$

is a minimal WFA computing  $f_1$ . We will show that the WFA  $A_1$  is exactly  $\hat{A}$ .

Let  $\sigma \in \Sigma$ . We start by showing that  $\mathbf{A}_1^\sigma = \hat{\mathbf{A}}^\sigma$ . It is easy to check that  $\mathbf{H} = \mathbf{P} \mathbf{S}$  and  $\mathbf{H}^\sigma = \mathbf{P} \mathbf{A}^\sigma \mathbf{S}$ . Furthermore, since  $\mathbf{H}^\sigma = \mathbf{H}^\sigma \mathbf{S}^\dagger \mathbf{S}$  we have  $\mathbf{H}_1^\sigma = \mathbf{H}^\sigma \mathbf{S}^\dagger \mathbf{S}_1$ , which implies  $\mathbf{A}^\sigma \mathbf{S}_1 = \mathbf{P}^\dagger \mathbf{H}^\sigma \mathbf{S}^\dagger \mathbf{S}_1 =$

$\mathbf{P}^\dagger \mathbf{H}_1^\sigma$ . It then follows that

$$\begin{aligned}\mathbf{A}_1^\sigma &= \mathbf{U}_1^\top \mathbf{P} \mathbf{A}^\sigma \mathbf{P}^\dagger \mathbf{U}_1 \\ &= \mathbf{U}_1^\top \mathbf{P} \mathbf{A}^\sigma \mathbf{P}^\dagger \mathbf{U}_1 (\mathbf{D}_1 \mathbf{V}_1^\top \mathbf{V}_1 \mathbf{D}_1^{-1}) \\ &= \mathbf{U}_1^\top \mathbf{P} \mathbf{A}^\sigma \mathbf{P}^\dagger \mathbf{H}_1 \mathbf{V}_1 \mathbf{D}_1^{-1} \\ &= \mathbf{U}_1^\top \mathbf{P} \mathbf{A}^\sigma \mathbf{S}_1 \mathbf{V}_1 \mathbf{D}_1^{-1} \\ &= \mathbf{U}_1^\top \mathbf{P} \mathbf{P}^\dagger \mathbf{H}_1^\sigma \mathbf{V}_1 \mathbf{D}_1^{-1} \\ &= \mathbf{U}_1^\top \mathbf{H}_1^\sigma \mathbf{V}_1 \mathbf{D}_1^{-1} = \hat{\mathbf{A}}^\sigma\end{aligned}$$

where we also used the fact that  $\mathbf{P} \mathbf{P}^\dagger \mathbf{H}_1^\sigma = \mathbf{H}_1^\sigma$  and  $\mathbf{P}^\dagger \mathbf{H}_1 = \mathbf{S}_1$ . Now since the column space of  $\mathbf{U}_1$  is contained in the column space of  $\mathbf{P}$ , we have  $\mathbf{U}_1^\top \mathbf{P} \mathbf{P}^\dagger = \mathbf{U}_1^\top$  (and similarly  $\mathbf{P} \mathbf{P}^\dagger \mathbf{U}_1 = \mathbf{U}_1$ ). Using the this fact and observing that  $\boldsymbol{\alpha}^\top = \mathbf{H}_{\lambda,:} \mathbf{S}^\dagger$  and  $\boldsymbol{\Omega} = \mathbf{P}^\dagger (\mathcal{H}_{:, :, \lambda})$  we get

$$\boldsymbol{\alpha}_1^\top = \boldsymbol{\alpha}^\top \mathbf{P}^\dagger \mathbf{U}_1 = \mathbf{H}_{\lambda,:} \mathbf{S}^\dagger \mathbf{P}^\dagger \mathbf{U}_1 = \mathbf{P}_{\lambda,:} \mathbf{P}^\dagger \mathbf{U}_1 = (\mathbf{U}_1)_{\lambda,:} = \hat{\boldsymbol{\alpha}}^\top$$

and

$$\boldsymbol{\omega}_1 = \mathbf{U}_1^\top \mathbf{P} \boldsymbol{\Omega}_{:,1} = \mathbf{U}_1^\top \mathbf{P} \mathbf{P}^\dagger (\mathcal{H}_{:,1,\lambda}) = \mathbf{U}_1^\top (\mathbf{H}_1)_{:, \lambda} = \hat{\boldsymbol{\omega}}$$

which concludes the proof.  $\square$

#### 1.4 Proof of Theorem 5

**Theorem.** Let  $\mathbf{M} \in \mathbb{R}^{d_1 \times d_2}$  be of rank  $R$  and let  $\hat{\mathbf{M}} = \mathbf{M} + \mathbf{E}$  where  $\mathbf{E}$  is a random noise term such that  $\frac{\text{vec}(\mathbf{E})}{\|\mathbf{E}\|_F}$  follows a uniform distribution on the unit sphere in  $\mathbb{R}^{d_1 d_2}$ . Let  $\boldsymbol{\Pi}_U, \boldsymbol{\Pi}_{\hat{U}} \in \mathbb{R}^{d_1 \times d_1}$  be the matrices of the orthogonal projections onto the space spanned by the top  $R$  left singular vectors of  $\mathbf{M}$  and  $\hat{\mathbf{M}}$  respectively.

Let  $\delta > 0$ , let  $\alpha = \mathfrak{s}_R(\mathbf{M})$  be the smallest non-zero singular value of  $\mathbf{M}$  and suppose that  $\|\mathbf{E}\|_F \leq \alpha/2$ . Then, with probability at least  $1 - \delta$ ,

$$\|\boldsymbol{\Pi}_U - \boldsymbol{\Pi}_{\hat{U}}\|_F \leq 4 \left( \sqrt{\frac{(d_1 - R)R + 2 \log(1/\delta)}{d_1 d_2}} \frac{\|\mathbf{E}\|_F}{\alpha} + \frac{\|\mathbf{E}\|_F^2}{\alpha^2} \right).$$

Let  $\boldsymbol{\Pi}_{U_\perp} = \mathbf{I} - \boldsymbol{\Pi}_U$  and  $\boldsymbol{\Pi}_{V_\perp} = \mathbf{I} - \boldsymbol{\Pi}_V$ . Then, under the assumption  $\|\mathbf{E}\|_F \leq \alpha/2$ , it follows from Theorem 1 in [?] that

$$\|\boldsymbol{\Pi}_U - \boldsymbol{\Pi}_{\hat{U}}\|_F \leq \frac{2\sqrt{2}}{\alpha} \left( \|\boldsymbol{\Pi}_{U_\perp} \mathbf{E} \boldsymbol{\Pi}_V\|_F + \frac{\|\boldsymbol{\Pi}_{U_\perp} \mathbf{E} \boldsymbol{\Pi}_{V_\perp}\|_F \cdot \|\boldsymbol{\Pi}_U \mathbf{E} \boldsymbol{\Pi}_{V_\perp}\|_F}{\alpha} \right).$$

The second term of the sum can be bounded using the fact that both  $\|\boldsymbol{\Pi}_{U_\perp} \mathbf{E} \boldsymbol{\Pi}_{V_\perp}\|_F$  and  $\|\boldsymbol{\Pi}_U \mathbf{E} \boldsymbol{\Pi}_{V_\perp}\|_F$  are bounded by  $\|\mathbf{E}\|_F$ . Indeed we have e.g.

$$\|\boldsymbol{\Pi}_{U_\perp} \mathbf{E} \boldsymbol{\Pi}_{V_\perp}\|_F = \|(\boldsymbol{\Pi}_{V_\perp} \otimes \boldsymbol{\Pi}_{U_\perp}) \text{vec}(\mathbf{E})\|_F \leq \|\text{vec}(\mathbf{E})\|_F = \|\mathbf{E}\|_F$$

since  $\boldsymbol{\Pi}_{V_\perp} \otimes \boldsymbol{\Pi}_{U_\perp}$  is the matrix of an orthogonal projection. To bound the first term, we use the following lemma showing that the norm of a  $d$ -dimensional random vector  $\mathbf{v}$  projected onto a fixed subspace of dimension  $k$  will be concentrated around  $\sqrt{k/d} \|\mathbf{v}\|$ .

**Lemma 1.** Let  $\boldsymbol{\Pi} \in \mathbb{R}^{d \times d}$  be a rank  $k$  projection matrix and let  $\mathbf{v} \in \mathbb{R}^d$  be a random variable such that  $\frac{\mathbf{v}}{\|\mathbf{v}\|}$  follows a uniform distribution on the unit sphere in  $\mathbb{R}^d$ . Then, for any  $\delta > 0$ ,

$$\mathbb{P} \left[ \|\boldsymbol{\Pi} \mathbf{v}\|_2^2 > 2 \frac{k + 2 \log(1/\delta)}{d} \|\mathbf{v}\|_2^2 \right] \leq \delta.$$

*Proof.* This directly comes from the following classical result (see e.g. Lemma 2.4 in [?]): if  $\mathbf{x}$  is a random unit vector drawn uniformly from the unit sphere we have for any  $\beta > 1$

$$\mathbb{P} \left[ \|\boldsymbol{\Pi} \mathbf{x}\|_2^2 \leq \beta \frac{k}{d} \right] \leq \exp \left\{ \frac{k}{2} (1 - \beta + \log \beta) \right\}.$$

Using the inequality  $\log \beta \leq \beta/2$ , the right term can be upper bounded by  $\exp(k/2(1 - \beta/2))$ , and by setting this upper bound equal to  $\delta$  we get  $\beta = 2(1 + 2 \log(1/\delta)/k)$  which leads to the result.  $\square$

Applying this lemma to  $\|\Pi_{U^\perp} \mathbf{E} \Pi_V\|_F = \|(\Pi_V \otimes \Pi_{U^\perp}) \text{vec}(\mathbf{E})\|_2$  by observing that  $\Pi_V \otimes \Pi_{U^\perp}$  is a  $d_1 d_2 \times d_1 d_2$  projection matrix of rank  $R(d_1 - R)$ , we get that  $\|\Pi_{U^\perp} \mathbf{E} \Pi_V\|_F \leq \sqrt{2 \frac{(d_1 - R)R + 2 \log(1/\delta)}{d_1 d_2}} \|\mathbf{E}\|_F$  with probability at least  $1 - \delta$  which concludes the proof.

## 2 Additional Experiments on Synthetic Data

In Figure 1, we present additional experimental results on the synthetic datasets: we added the case of totally unrelated tasks ( $d_S = 0, d_T = 10$ ) and we included the performances of MT-SL-noproj in all plots. These additional results show that the projection step of MT-SL is crucial when the tasks are loosely related or totally unrelated, and that the results for the case of totally unrelated tasks are similar to the ones obtained when the tasks are only loosely related ( $d_S = 10, d_T = 10$ ).

## 3 Detailed Results for Experiments on Real Data

The perplexity and WER on the test sets for all languages are reported in Table 1 when MT-SL is used with all other languages as related tasks, and in Table 2 when only the 4 closest languages are used. The list of the closest languages used for each task can be found in Table 3.

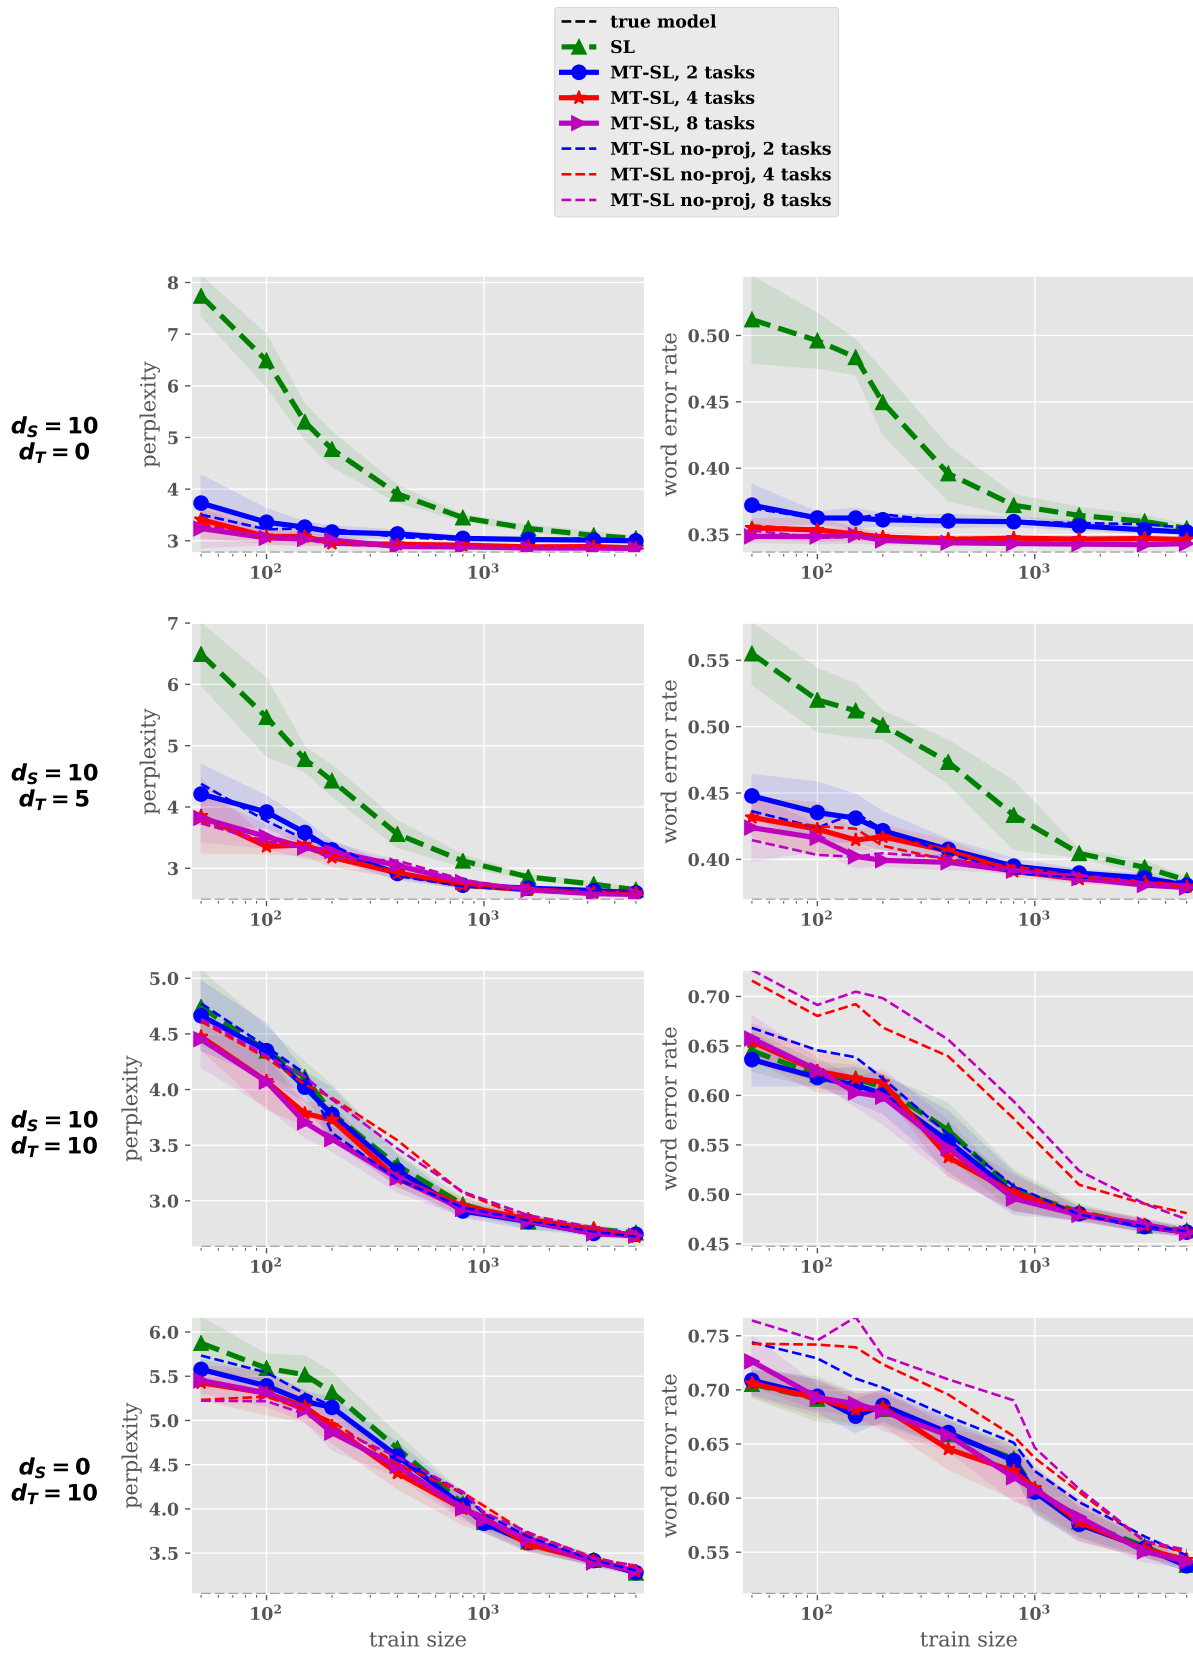

Figure 1: Additional experimental results on the synthetic datasets.

Table 1: Detailed experimental results on the UNIDEP dataset when all other languages are used as related tasks.

| Language      | Training size | Perplexity   |              |              |                | Word Error Rate |               |               |                |
|---------------|---------------|--------------|--------------|--------------|----------------|-----------------|---------------|---------------|----------------|
|               |               | SL           | SL bagging   | MT-SL        | MT-SL no proj. | SL              | SL bagging    | MT-SL         | MT-SL no proj. |
| Ancient Greek | 100           | 4.053        | 4.997        | 4.030        | 4.266          | 82.445          | <b>76.293</b> | 82.445        | 79.883         |
|               | 500           | 4.194        | 5.000        | 4.195        | 4.233          | 81.572          | 76.211        | <b>74.438</b> | 78.768         |
|               | 1000          | 4.203        | 4.995        | 4.192        | 4.246          | 77.696          | 76.185        | <b>75.020</b> | 77.601         |
|               | all           | 4.582        | 4.925        | 4.564        | 4.676          | 75.596          | 75.875        | 75.804        | 79.972         |
| Arabic        | 100           | 2.316        | 2.347        | 2.258        | 2.291          | 77.306          | 77.264        | 77.161        | 82.452         |
|               | 500           | 2.298        | 2.347        | 2.298        | 2.298          | 68.804          | 77.285        | 68.804        | 73.954         |
|               | 1000          | 2.315        | 2.347        | 2.311        | 2.311          | 68.066          | 77.288        | 68.066        | 74.109         |
|               | all           | 2.306        | 2.336        | 2.338        | 2.338          | 66.595          | 77.578        | 66.595        | 73.668         |
| Basque        | 100           | 5.932        | 9.370        | 5.932        | 6.842          | 75.956          | 77.305        | <b>73.515</b> | 75.796         |
|               | 500           | 6.057        | 9.368        | <b>5.950</b> | 7.009          | 76.300          | 77.240        | <b>70.351</b> | 75.223         |
|               | 1000          | 6.261        | 9.364        | 6.261        | 7.369          | 77.129          | 77.290        | <b>68.666</b> | 74.329         |
|               | all           | 6.760        | 9.276        | 6.760        | 7.640          | 75.803          | 76.602        | <b>68.192</b> | 75.754         |
| Bulgarian     | 100           | 5.103        | 6.659        | <b>4.722</b> | 5.613          | 74.647          | <b>67.490</b> | 73.525        | 73.525         |
|               | 500           | 5.475        | 6.649        | 5.475        | 5.669          | 68.576          | 67.644        | <b>65.312</b> | 73.329         |
|               | 1000          | 5.649        | 6.617        | 5.649        | 5.888          | 66.059          | 67.875        | <b>64.279</b> | 76.350         |
|               | all           | 6.162        | 6.485        | 6.162        | 6.380          | 66.018          | 70.736        | <b>62.196</b> | 73.389         |
| Croatian      | 100           | 5.510        | 4.946        | 4.870        | 4.870          | 75.468          | 76.694        | 75.653        | 79.445         |
|               | 500           | 5.336        | <b>4.946</b> | 5.167        | 5.167          | 77.503          | 76.717        | 77.757        | 79.098         |
|               | 1000          | 5.454        | <b>4.947</b> | 5.257        | 5.257          | 77.526          | 76.532        | 77.757        | <b>75.329</b>  |
|               | all           | 5.285        | <b>4.938</b> | 5.260        | 5.260          | 77.919          | 76.624        | 76.000        | 77.942         |
| Czech         | 100           | 4.292        | 5.319        | 4.292        | 4.357          | 77.897          | <b>75.868</b> | 77.262        | 77.760         |
|               | 500           | 4.482        | 5.316        | 4.444        | 4.501          | 77.257          | 75.899        | <b>71.326</b> | 75.608         |
|               | 1000          | 4.530        | 5.310        | 4.530        | 4.533          | 75.254          | 75.887        | 74.471        | 74.623         |
|               | all           | 5.091        | 5.141        | 5.091        | 5.125          | 73.849          | 73.382        | <b>71.325</b> | 75.827         |
| Danish        | 100           | 4.977        | 5.016        | <b>4.838</b> | 5.011          | 78.891          | <b>75.137</b> | 79.133        | 80.986         |
|               | 500           | 5.033        | 5.054        | 5.034        | 5.034          | 71.737          | 75.185        | 71.737        | 81.228         |
|               | 1000          | 5.189        | 5.062        | 5.016        | 5.016          | 71.737          | 75.314        | 71.737        | 79.842         |
|               | all           | 5.363        | <b>4.999</b> | 5.176        | 5.176          | 70.674          | 74.460        | 70.674        | 78.714         |
| Dutch         | 100           | 6.456        | 6.592        | <b>5.603</b> | 6.302          | 77.525          | 75.649        | 75.113        | 78.094         |
|               | 500           | 7.679        | 6.556        | 7.694        | <b>6.402</b>   | 75.498          | 75.314        | 75.498        | 79.434         |
|               | 1000          | 7.517        | <b>6.563</b> | 7.327        | 7.438          | 73.874          | 75.264        | 73.874        | 79.434         |
|               | all           | 8.025        | <b>6.524</b> | 8.201        | 8.201          | 72.785          | 74.711        | 72.785        | 76.101         |
| English       | 100           | 5.203        | 6.862        | <b>4.874</b> | 5.086          | 73.853          | 74.397        | 73.853        | 77.573         |
|               | 500           | <b>5.620</b> | 6.820        | 5.774        | 5.722          | 71.729          | 74.508        | 71.777        | 79.741         |
|               | 1000          | 5.781        | 6.805        | 5.748        | 5.748          | 72.716          | 74.559        | <b>69.672</b> | 72.925         |
|               | all           | 6.464        | 6.572        | 6.464        | 6.595          | 67.626          | 74.143        | 67.626        | 74.213         |
| Estonian      | 100           | 5.301        | 9.339        | <b>4.534</b> | 5.219          | 50.506          | 71.389        | 50.506        | 57.866         |
|               | 500           | 6.108        | 8.776        | 5.625        | <b>5.341</b>   | <b>49.586</b>   | 72.493        | 50.874        | 68.169         |
|               | 1000          | 6.605        | 8.557        | <b>6.254</b> | 7.443          | 50.138          | 68.721        | 50.138        | 57.222         |
|               | all           | 6.653        | 8.522        | <b>5.706</b> | 7.221          | 50.046          | 68.629        | 50.414        | 58.786         |
| Finnish       | 100           | 5.598        | 9.418        | <b>5.153</b> | 5.153          | 68.774          | 70.140        | 68.774        | 72.302         |
|               | 500           | 5.964        | 9.370        | <b>5.712</b> | 5.970          | 67.586          | 70.062        | 66.701        | 74.047         |
|               | 1000          | 6.231        | 9.290        | <b>5.844</b> | 6.008          | 66.366          | 70.012        | 65.724        | 74.778         |
|               | all           | 7.709        | 8.580        | <b>7.420</b> | 7.642          | 63.811          | 70.893        | 62.848        | 66.612         |
| French        | 100           | 3.744        | 3.843        | <b>3.273</b> | 3.493          | 69.245          | <b>66.115</b> | 68.658        | 70.831         |
|               | 500           | 3.611        | 3.855        | 3.611        | 3.720          | 63.669          | 66.143        | 63.600        | 71.911         |
|               | 1000          | 3.735        | 3.843        | 3.657        | 3.657          | 59.787          | 66.170        | 60.662        | 74.194         |
|               | all           | 3.823        | 3.830        | 3.823        | 3.875          | 59.732          | 65.377        | 59.732        | 69.615         |
| German        | 100           | 5.756        | 5.825        | <b>5.234</b> | 5.234          | 78.498          | <b>74.769</b> | 78.458        | 80.864         |
|               | 500           | 5.960        | 5.812        | <b>5.580</b> | 5.580          | 76.283          | <b>74.891</b> | 76.283        | 78.684         |
|               | 1000          | 5.722        | 5.814        | 5.722        | 5.424          | 75.436          | 74.949        | 74.868        | 78.150         |
|               | all           | 6.056        | <b>5.704</b> | 6.056        | 5.920          | <b>72.554</b>   | 74.683        | 73.790        | 79.467         |
| Gothic        | 100           | 6.124        | 8.726        | 6.183        | 6.196          | 81.109          | 76.555        | 76.165        | 79.461         |
|               | 500           | 6.694        | 8.708        | <b>6.565</b> | 7.091          | 76.484          | 76.502        | <b>72.869</b> | 75.740         |
|               | 1000          | 6.934        | 8.701        | <b>6.676</b> | 6.904          | 75.244          | 76.537        | <b>72.391</b> | 76.874         |
|               | all           | 7.777        | 8.704        | <b>7.178</b> | 7.613          | 74.074          | 76.927        | <b>72.479</b> | 75.137         |
| Greek         | 100           | 4.178        | 3.868        | 3.769        | 3.769          | 67.287          | 69.386        | 67.287        | 74.632         |
|               | 500           | 4.071        | 3.868        | 3.949        | 3.949          | 66.323          | 69.403        | 66.323        | 74.886         |
|               | 1000          | 4.190        | <b>3.868</b> | 3.985        | 3.985          | 66.847          | 69.369        | 66.847        | 74.801         |
|               | all           | 4.110        | <b>3.866</b> | 3.997        | 3.997          | 66.695          | 69.352        | 67.203        | 72.686         |
| Hebrew        | 100           | 3.899        | 3.914        | <b>3.790</b> | 3.790          | 72.796          | 73.129        | 72.796        | 82.966         |
|               | 500           | 3.928        | 3.912        | 3.828        | 3.828          | 76.625          | <b>73.114</b> | 76.625        | 76.316         |
|               | 1000          | 3.904        | 3.908        | 3.859        | 3.859          | 73.724          | 73.145        | 73.724        | 78.131         |
|               | all           | 4.022        | 3.910        | 3.945        | 3.945          | 73.359          | 73.137        | 73.359        | 79.027         |

| Language            | Training size | Perplexity   |              |              |                | Word Error Rate |               |               |                |
|---------------------|---------------|--------------|--------------|--------------|----------------|-----------------|---------------|---------------|----------------|
|                     |               | SL           | SL bagging   | MT-SL        | MT-SL no proj. | SL              | SL bagging    | MT-SL         | MT-SL no proj. |
| Hindi               | 100           | 4.167        | 5.019        | 4.099        | 4.099          | 61.818          | 77.203        | 61.818        | 75.473         |
|                     | 500           | 4.015        | 5.018        | 4.015        | 4.150          | 60.958          | 77.197        | 60.958        | 76.208         |
|                     | 1000          | 4.235        | 5.016        | 4.235        | 4.557          | 62.850          | 77.197        | 62.850        | 73.142         |
|                     | all           | 4.340        | 4.952        | 4.319        | 4.411          | 59.818          | 77.162        | 59.818        | 70.731         |
| Hungarian           | 100           | 5.762        | 5.048        | <b>4.845</b> | 4.845          | 69.368          | 76.319        | 69.368        | 76.668         |
|                     | 500           | 5.727        | <b>5.047</b> | 5.184        | 5.184          | 68.949          | 76.319        | 68.599        | 80.091         |
|                     | 1000          | 5.801        | <b>5.051</b> | 5.215        | 5.215          | 68.809          | 76.249        | 68.914        | 79.776         |
|                     | all           | 5.592        | 5.056        | 5.147        | 5.147          | 69.263          | 76.249        | 69.193        | 79.462         |
| Indonesian          | 100           | 4.687        | 4.663        | <b>4.139</b> | 4.351          | 74.581          | 77.871        | 74.581        | 79.890         |
|                     | 500           | 4.630        | 4.658        | <b>4.296</b> | 4.296          | 71.411          | 77.880        | 71.411        | 78.204         |
|                     | 1000          | 4.601        | 4.663        | <b>4.494</b> | 4.494          | 70.901          | 77.807        | 70.901        | 78.520         |
|                     | all           | 4.734        | 4.658        | 4.614        | 4.614          | 71.160          | 77.896        | 71.160        | 77.734         |
| Irish               | 100           | 3.587        | <b>3.446</b> | 3.591        | 3.591          | 67.086          | 73.835        | 67.086        | 79.451         |
|                     | 500           | 3.548        | 3.453        | 3.463        | 3.463          | 66.230          | 73.835        | 66.230        | 73.659         |
|                     | 1000          | 3.594        | <b>3.453</b> | 3.559        | 3.559          | 66.885          | 73.886        | 66.885        | 76.077         |
|                     | all           | 3.594        | <b>3.453</b> | 3.559        | 3.559          | 66.885          | 73.886        | 66.885        | 76.077         |
| Italian             | 100           | 3.343        | 3.769        | 3.249        | 3.254          | 64.584          | 70.483        | <b>63.036</b> | 70.090         |
|                     | 500           | 3.450        | 3.765        | <b>3.276</b> | 3.276          | 58.054          | 69.688        | 58.054        | 63.867         |
|                     | 1000          | 3.466        | 3.761        | <b>3.355</b> | 3.355          | 57.880          | 69.094        | 57.880        | 62.757         |
|                     | all           | 3.620        | 3.580        | 3.506        | 3.506          | 57.574          | 63.307        | 57.574        | 63.972         |
| Japanese            | 100           | 2.981        | 3.586        | 2.888        | 3.162          | 64.651          | 82.419        | 64.651        | 74.700         |
|                     | 500           | 3.148        | 3.566        | 3.124        | 3.175          | 60.545          | 82.773        | 60.545        | 69.113         |
|                     | 1000          | 3.197        | 3.564        | 3.197        | 3.199          | 61.664          | 82.618        | 61.664        | 69.308         |
|                     | all           | 3.196        | 3.538        | 3.221        | 3.255          | 61.837          | 82.946        | <b>59.632</b> | 73.626         |
| Latin               | 100           | 4.707        | 6.825        | 4.707        | 5.137          | 79.580          | <b>74.320</b> | 75.690        | 79.660         |
|                     | 500           | 5.143        | 6.815        | 5.143        | 5.462          | 76.556          | <b>74.317</b> | 75.753        | 79.837         |
|                     | 1000          | 5.299        | 6.805        | 5.299        | 5.625          | 75.919          | 74.345        | 74.974        | 81.735         |
|                     | all           | 6.241        | 6.711        | 6.239        | 6.428          | 75.179          | 74.300        | <b>72.662</b> | 78.787         |
| Norwegian           | 100           | 5.089        | 6.190        | <b>4.911</b> | 4.911          | 74.544          | 74.435        | <b>72.514</b> | 76.952         |
|                     | 500           | 5.164        | 6.152        | <b>4.983</b> | 5.117          | 71.926          | 74.297        | <b>70.353</b> | 73.650         |
|                     | 1000          | 5.235        | 6.141        | 5.147        | 5.318          | 69.887          | 74.194        | 69.199        | 75.864         |
|                     | all           | 5.733        | 6.009        | <b>5.632</b> | 5.882          | 69.487          | 72.937        | <b>66.716</b> | 75.626         |
| Old Church Slavonic | 100           | 5.959        | 11.445       | 5.886        | 6.203          | 74.092          | 77.813        | <b>72.284</b> | 74.588         |
|                     | 500           | 7.172        | 11.465       | <b>6.733</b> | 7.096          | 70.441          | 77.778        | 69.697        | 73.932         |
|                     | 1000          | 7.765        | 11.420       | <b>7.307</b> | 7.901          | 68.297          | 77.760        | 67.978        | 73.826         |
|                     | all           | 8.889        | 11.086       | <b>8.465</b> | 8.949          | 68.067          | 75.970        | <b>66.968</b> | 69.981         |
| Persian             | 100           | 3.231        | 3.489        | <b>3.012</b> | 3.209          | 67.501          | 72.542        | 61.352        | 61.352         |
|                     | 500           | 3.256        | 3.501        | 3.244        | 3.345          | 59.253          | 72.560        | 59.253        | 76.483         |
|                     | 1000          | 3.274        | 3.495        | 3.318        | 3.332          | 58.429          | 72.500        | <b>56.822</b> | 74.437         |
|                     | all           | 3.339        | 3.473        | 3.339        | 3.423          | 58.164          | 72.554        | <b>55.354</b> | 65.353         |
| Polish              | 100           | 4.686        | 8.871        | 4.745        | 5.276          | 65.963          | 69.578        | 65.078        | 70.210         |
|                     | 500           | 5.288        | 8.858        | <b>5.108</b> | 5.579          | 68.643          | 69.565        | <b>62.588</b> | 69.565         |
|                     | 1000          | 5.466        | 8.832        | <b>5.333</b> | 5.978          | 68.984          | 69.451        | <b>63.208</b> | 72.434         |
|                     | all           | 6.404        | 8.295        | <b>6.184</b> | 6.865          | 63.802          | 68.466        | 63.802        | 69.363         |
| Portuguese          | 100           | 3.761        | 4.359        | 3.679        | 3.891          | 74.216          | <b>67.880</b> | 72.819        | 79.643         |
|                     | 500           | 3.988        | 4.402        | 3.989        | 3.989          | 69.862          | 67.864        | 67.815        | 71.990         |
|                     | 1000          | <b>4.059</b> | 4.382        | 4.210        | 4.210          | 68.952          | 68.058        | 68.952        | 68.725         |
|                     | all           | 4.288        | 4.308        | 4.342        | 4.342          | 68.757          | 67.490        | <b>65.491</b> | 69.829         |
| Romanian            | 100           | 7.269        | 5.799        | <b>4.923</b> | 4.923          | 71.105          | 71.997        | 71.311        | 78.655         |
|                     | 500           | 7.269        | <b>5.792</b> | 6.288        | 6.288          | <b>69.526</b>   | 71.997        | 70.899        | 79.753         |
|                     | 1000          | 7.269        | <b>5.792</b> | 6.288        | 6.288          | <b>69.526</b>   | 71.997        | 70.899        | 79.753         |
|                     | all           | 7.269        | <b>5.792</b> | 6.288        | 6.288          | <b>69.526</b>   | 71.997        | 70.899        | 79.753         |
| Slovenian           | 100           | 5.156        | 5.383        | <b>4.540</b> | 4.788          | 81.297          | <b>71.790</b> | 74.692        | 77.903         |
|                     | 500           | 5.429        | 5.385        | <b>4.993</b> | 4.993          | 71.231          | 71.790        | 71.231        | 80.213         |
|                     | 1000          | 5.387        | 5.384        | <b>5.083</b> | 5.083          | 71.588          | 71.783        | <b>68.754</b> | 77.257         |
|                     | all           | 5.605        | 5.347        | 5.406        | 5.406          | 70.875          | 71.635        | <b>64.943</b> | 77.244         |
| Spanish             | 100           | 3.109        | 3.125        | 2.983        | <b>2.969</b>   | 67.607          | <b>66.355</b> | 67.607        | 76.468         |
|                     | 500           | 3.114        | 3.121        | 3.069        | 3.069          | 67.898          | <b>66.440</b> | 67.898        | 73.794         |
|                     | 1000          | 3.166        | 3.120        | 3.070        | 3.070          | 64.750          | 66.452        | 64.750        | 68.798         |
|                     | all           | 3.265        | 3.107        | 3.176        | 3.176          | 64.702          | 66.136        | 64.702        | 71.727         |
| Swedish             | 100           | 5.184        | 5.480        | <b>4.761</b> | 4.768          | 72.166          | 73.602        | 72.166        | 76.144         |
|                     | 500           | 5.379        | 5.482        | <b>5.108</b> | 5.108          | 70.268          | 73.634        | 70.268        | 77.311         |
|                     | 1000          | 5.482        | 5.481        | <b>5.202</b> | 5.202          | 68.971          | 73.662        | 68.971        | 75.125         |
|                     | all           | 5.737        | 5.461        | 5.489        | 5.489          | 68.878          | 72.819        | 68.878        | 78.565         |
| Tamil               | 100           | 8.289        | 6.884        | <b>5.859</b> | 5.859          | 66.999          | 76.102        | 66.098        | 74.395         |
|                     | 500           | 8.305        | 6.884        | <b>6.149</b> | 6.149          | 66.524          | 76.055        | 67.330        | 80.512         |
|                     | 1000          | 8.305        | 6.884        | <b>6.149</b> | 6.149          | 66.524          | 76.055        | 67.330        | 80.512         |
|                     | all           | 8.305        | 6.884        | <b>6.149</b> | 6.149          | 66.524          | 76.055        | 67.330        | 80.512         |

Table 2: Detailed experimental results on the UNIDEP dataset when the 4 closest languages are used as related tasks. The closest languages used for each target task are reported in Table 3.

| Language      | Training size | Perplexity |              |              |                | Word Error Rate |               |               |                |
|---------------|---------------|------------|--------------|--------------|----------------|-----------------|---------------|---------------|----------------|
|               |               | SL         | SL bagging   | MT-SL        | MT-SL no proj. | SL              | SL bagging    | MT-SL         | MT-SL no proj. |
| Ancient Greek | 100           | 4.053      | 4.960        | 3.998        | 4.288          | 82.445          | <b>77.187</b> | 81.998        | 81.998         |
|               | 500           | 4.194      | 4.952        | 4.128        | 4.211          | 81.572          | 77.493        | 78.207        | 80.225         |
|               | 1000          | 4.203      | 5.014        | 4.212        | 4.375          | 77.696          | 77.268        | 79.554        | 79.554         |
|               | all           | 4.582      | 4.651        | 4.612        | 4.640          | 75.596          | 76.220        | 76.850        | 76.850         |
| Arabic        | 100           | 2.316      | 2.367        | 2.245        | 2.289          | 77.306          | <b>76.098</b> | 77.161        | 81.334         |
|               | 500           | 2.298      | 2.365        | 2.285        | 2.285          | 68.804          | 75.839        | 68.804        | 77.468         |
|               | 1000          | 2.315      | 2.362        | 2.287        | 2.287          | 68.066          | 75.970        | 68.066        | 80.260         |
|               | all           | 2.306      | 2.334        | 2.300        | 2.300          | 66.595          | 75.794        | 66.595        | 75.418         |
| Basque        | 100           | 5.932      | 9.375        | 5.984        | 6.544          | 75.956          | 77.129        | <b>70.290</b> | 75.333         |
|               | 500           | 6.057      | 9.307        | 5.961        | 7.264          | 76.300          | 76.892        | <b>65.820</b> | 73.121         |
|               | 1000          | 6.261      | 9.271        | 6.170        | 7.281          | 77.129          | 76.747        | <b>68.582</b> | 72.586         |
|               | all           | 6.760      | 8.815        | 6.760        | 7.868          | 75.803          | 75.280        | <b>69.064</b> | 73.813         |
| Bulgarian     | 100           | 5.103      | 6.853        | <b>5.001</b> | 5.596          | 74.647          | <b>67.056</b> | 70.861        | 73.288         |
|               | 500           | 5.475      | 6.800        | 5.475        | 5.801          | 68.576          | 67.027        | 66.065        | 69.021         |
|               | 1000          | 5.649      | 6.785        | <b>5.436</b> | 5.696          | 66.059          | 66.855        | <b>63.816</b> | 70.386         |
|               | all           | 6.162      | 6.403        | 6.162        | 6.269          | 66.018          | 66.303        | <b>64.024</b> | 67.596         |
| Croatian      | 100           | 5.510      | 4.918        | <b>4.475</b> | 4.475          | 75.468          | <b>70.636</b> | 75.653        | 80.301         |
|               | 500           | 5.336      | 4.927        | <b>4.608</b> | 4.608          | 77.503          | <b>70.636</b> | 75.561        | 75.561         |
|               | 1000          | 5.454      | 4.896        | 4.841        | 4.841          | 77.526          | <b>70.636</b> | 76.069        | 76.069         |
|               | all           | 5.285      | <b>4.897</b> | 5.163        | 5.163          | 77.919          | <b>70.613</b> | 77.387        | 77.387         |
| Czech         | 100           | 4.292      | 5.383        | 4.232        | 4.232          | 77.897          | <b>75.731</b> | 77.342        | 77.891         |
|               | 500           | 4.482      | 5.373        | 4.482        | 4.518          | 77.257          | 75.155        | <b>72.426</b> | 74.847         |
|               | 1000          | 4.530      | 5.370        | 4.531        | 4.548          | 75.254          | 75.451        | 74.346        | 75.049         |
|               | all           | 5.091      | 5.087        | 5.091        | 5.106          | 73.849          | 70.747        | 71.693        | 74.949         |
| Danish        | 100           | 4.977      | 4.943        | <b>4.662</b> | 4.894          | 78.891          | <b>74.299</b> | 77.892        | 77.892         |
|               | 500           | 5.033      | <b>4.929</b> | 5.045        | 4.963          | 71.737          | 74.041        | 72.430        | 78.005         |
|               | 1000          | 5.189      | 4.952        | <b>4.828</b> | 4.828          | 71.737          | 73.816        | 71.737        | 77.409         |
|               | all           | 5.363      | <b>4.864</b> | 5.203        | 5.022          | 70.674          | 73.751        | <b>69.562</b> | 73.284         |
| Dutch         | 100           | 6.456      | 6.777        | <b>5.956</b> | 5.956          | 77.525          | 77.307        | 76.470        | 80.807         |
|               | 500           | 7.679      | <b>6.847</b> | 7.232        | 7.156          | 75.498          | 76.888        | 75.498        | 78.262         |
|               | 1000          | 7.517      | <b>6.774</b> | 7.107        | 7.107          | 73.874          | 76.218        | 73.874        | 78.664         |
|               | all           | 8.025      | <b>6.509</b> | 8.062        | 8.062          | 72.785          | 73.020        | 72.098        | 77.608         |
| English       | 100           | 5.203      | 7.387        | 5.115        | 5.444          | 73.853          | <b>70.478</b> | 73.956        | 73.956         |
|               | 500           | 5.620      | 7.391        | 5.684        | 5.574          | 71.729          | 70.408        | 70.158        | 71.483         |
|               | 1000          | 5.781      | 7.337        | <b>5.631</b> | 5.817          | 72.716          | 70.559        | 69.720        | 70.180         |
|               | all           | 6.464      | 6.456        | 6.681        | 6.438          | 67.626          | 70.754        | 67.262        | 71.284         |
| Estonian      | 100           | 5.301      | 7.457        | 5.140        | <b>4.447</b>   | 50.506          | 55.934        | 50.506        | 56.210         |
|               | 500           | 6.108      | 7.864        | <b>5.250</b> | 5.250          | 49.586          | 53.450        | 49.770        | 57.038         |
|               | 1000          | 6.605      | 7.433        | <b>6.011</b> | 6.374          | 50.138          | 52.346        | 50.138        | 57.590         |
|               | all           | 6.653      | 7.287        | 7.322        | <b>6.504</b>   | 50.046          | 52.070        | 50.046        | 56.210         |
| Finnish       | 100           | 5.598      | 9.683        | <b>4.777</b> | 4.777          | 68.774          | 73.697        | 68.595        | 71.606         |
|               | 500           | 5.964      | 9.780        | 5.731        | <b>5.699</b>   | 67.586          | 71.407        | 67.397        | 69.773         |
|               | 1000          | 6.231      | 9.714        | <b>5.920</b> | 6.257          | 66.366          | 71.125        | 65.870        | 67.807         |
|               | all           | 7.709      | 8.494        | <b>7.516</b> | 7.672          | 63.811          | 66.091        | 63.558        | 64.885         |
| French        | 100           | 3.744      | 3.825        | 3.643        | <b>3.540</b>   | 69.245          | <b>62.247</b> | 65.787        | 68.548         |
|               | 500           | 3.611      | 3.821        | 3.611        | 3.586          | 63.669          | 62.165        | 61.577        | 68.617         |
|               | 1000          | 3.735      | 3.911        | <b>3.596</b> | 3.596          | <b>59.787</b>   | 62.083        | 61.331        | 62.739         |
|               | all           | 3.823      | 3.736        | 3.800        | 3.800          | <b>59.732</b>   | 62.097        | 60.894        | 64.858         |
| German        | 100           | 5.756      | 5.829        | <b>5.392</b> | 5.392          | 78.498          | <b>73.685</b> | 78.458        | 80.968         |
|               | 500           | 5.960      | 5.826        | 5.515        | <b>5.496</b>   | 76.283          | <b>73.047</b> | 77.176        | 74.543         |
|               | 1000          | 5.722      | 5.834        | <b>5.478</b> | 5.540          | 75.436          | 73.105        | 73.958        | 76.921         |
|               | all           | 6.056      | <b>5.651</b> | 6.056        | 6.117          | 72.554          | 72.728        | 72.264        | 76.979         |
| Gothic        | 100           | 6.124      | 8.230        | <b>5.966</b> | 5.966          | 81.109          | 76.573        | 76.590        | 80.082         |
|               | 500           | 6.694      | 8.261        | <b>6.539</b> | 6.539          | 76.484          | 76.077        | <b>73.348</b> | 76.023         |
|               | 1000          | 6.934      | 8.334        | 6.876        | 6.876          | 75.244          | 76.147        | <b>72.018</b> | 75.031         |
|               | all           | 7.777      | 8.069        | <b>7.187</b> | 7.551          | 74.074          | 75.563        | <b>72.391</b> | 74.216         |
| Greek         | 100           | 4.178      | 3.971        | <b>3.679</b> | 3.679          | 67.287          | 74.750        | 67.287        | 75.038         |
|               | 500           | 4.071      | 3.975        | 3.961        | 3.961          | 66.323          | 74.344        | 66.323        | 75.207         |
|               | 1000          | 4.190      | 3.959        | 3.997        | 3.997          | 66.847          | 73.549        | 66.847        | 72.821         |
|               | all           | 4.110      | 3.953        | 3.964        | 3.964          | 66.695          | 73.837        | 67.203        | 73.803         |
| Hebrew        | 100           | 3.899      | 3.873        | <b>3.736</b> | 3.736          | 72.796          | 74.897        | 72.796        | 75.127         |
|               | 500           | 3.928      | 3.873        | 3.802        | 3.802          | 76.625          | <b>74.889</b> | 76.625        | 78.702         |
|               | 1000          | 3.904      | 3.873        | 3.910        | 3.910          | 73.724          | 74.881        | 73.724        | 77.957         |
|               | all           | 4.022      | 3.870        | 3.907        | 3.907          | 73.359          | 74.929        | 73.359        | 77.172         |



| Language            | Training size | Perplexity   |            |              |                | Word Error Rate |               |               |                |
|---------------------|---------------|--------------|------------|--------------|----------------|-----------------|---------------|---------------|----------------|
|                     |               | SL           | SL bagging | MT-SL        | MT-SL no proj. | SL              | SL bagging    | MT-SL         | MT-SL no proj. |
| Hindi               | 100           | 4.167        | 4.727      | 4.165        | 4.164          | 61.818          | 70.421        | 60.942        | 68.074         |
|                     | 500           | 4.015        | 4.713      | 4.003        | 4.144          | 60.958          | 70.108        | 60.271        | 65.886         |
|                     | 1000          | 4.235        | 4.709      | 4.202        | 4.202          | 62.850          | 70.297        | <b>61.001</b> | 66.746         |
|                     | all           | 4.340        | 4.511      | 4.344        | 4.344          | 59.818          | 64.019        | 59.341        | 62.004         |
| Hungarian           | 100           | 5.762        | 5.190      | <b>4.837</b> | 4.837          | 69.368          | 78.484        | 69.368        | 78.764         |
|                     | 500           | 5.727        | 5.121      | 5.136        | 5.136          | 68.949          | 78.589        | 67.971        | 78.449         |
|                     | 1000          | 5.801        | 5.215      | 5.118        | 5.118          | <b>68.809</b>   | 79.008        | 70.031        | 76.808         |
|                     | all           | 5.592        | 5.119      | 5.089        | 5.089          | 69.263          | 79.218        | 69.752        | 76.808         |
| Indonesian          | 100           | 4.687        | 4.694      | <b>4.248</b> | 4.248          | 74.581          | 77.790        | 74.581        | 76.372         |
|                     | 500           | 4.630        | 4.672      | <b>4.339</b> | 4.339          | 71.411          | 78.382        | 71.411        | 77.985         |
|                     | 1000          | 4.601        | 4.675      | 4.522        | 4.522          | 70.901          | 78.439        | 70.901        | 76.745         |
|                     | all           | 4.734        | 4.626      | 4.572        | 4.572          | 71.160          | 78.520        | 71.160        | 75.902         |
| Irish               | 100           | 3.587        | 3.490      | 3.431        | 3.326          | 67.086          | 72.400        | 67.086        | 73.105         |
|                     | 500           | 3.548        | 3.457      | 3.417        | 3.417          | 66.230          | 72.425        | 66.230        | 74.969         |
|                     | 1000          | 3.594        | 3.455      | 3.425        | 3.425          | 66.885          | 72.098        | 66.885        | 72.450         |
|                     | all           | 3.594        | 3.455      | 3.425        | 3.425          | 66.885          | 72.098        | 66.885        | 72.450         |
| Italian             | 100           | 3.343        | 3.719      | 3.359        | 3.359          | 64.584          | 62.215        | <b>58.719</b> | 72.625         |
|                     | 500           | 3.450        | 3.717      | <b>3.336</b> | 3.336          | 58.054          | 62.320        | 58.054        | 66.594         |
|                     | 1000          | 3.466        | 3.678      | 3.457        | 3.457          | 57.880          | 61.822        | 56.962        | 65.274         |
|                     | all           | 3.620        | 3.542      | 3.575        | 3.575          | 57.574          | 59.156        | 57.276        | 61.183         |
| Japanese            | 100           | 2.981        | 3.492      | 3.003        | 3.030          | 64.651          | 67.524        | 64.651        | 69.963         |
|                     | 500           | 3.148        | 3.479      | 3.094        | 3.135          | 60.545          | 67.971        | 60.545        | 64.841         |
|                     | 1000          | 3.197        | 3.479      | 3.114        | 3.168          | 61.664          | 67.021        | 61.151        | 61.066         |
|                     | all           | 3.196        | 3.274      | 3.243        | 3.243          | 61.837          | 66.008        | 61.837        | 63.632         |
| Latin               | 100           | 4.707        | 6.542      | 4.713        | 4.972          | 79.580          | 78.638        | <b>75.902</b> | 81.986         |
|                     | 500           | 5.143        | 6.541      | 5.143        | 5.646          | 76.556          | 78.468        | 75.878        | 79.462         |
|                     | 1000          | 5.299        | 6.544      | 5.269        | 5.805          | 75.919          | 76.517        | 75.085        | 78.937         |
|                     | all           | 6.241        | 6.407      | 6.235        | 6.526          | 75.179          | 77.213        | <b>73.198</b> | 79.170         |
| Norwegian           | 100           | 5.089        | 6.234      | <b>4.929</b> | 4.929          | 74.544          | 71.695        | 72.483        | 72.483         |
|                     | 500           | 5.164        | 6.167      | 5.166        | 5.166          | 71.926          | 71.848        | <b>69.965</b> | 72.655         |
|                     | 1000          | 5.235        | 6.157      | 5.186        | 5.281          | 69.887          | 71.341        | <b>68.836</b> | 70.900         |
|                     | all           | 5.733        | 5.800      | 5.743        | 5.739          | 69.487          | 70.738        | <b>68.132</b> | 70.550         |
| Old Church Slavonic | 100           | 5.959        | 10.250     | 5.894        | 5.899          | 74.092          | 71.735        | 72.656        | 75.917         |
|                     | 500           | 7.172        | 10.273     | 7.071        | <b>6.934</b>   | 70.441          | 71.806        | <b>69.360</b> | 71.699         |
|                     | 1000          | 7.765        | 10.284     | 7.418        | <b>7.374</b>   | 68.297          | 72.072        | 68.138        | 71.629         |
|                     | all           | 8.889        | 9.712      | 8.662        | <b>8.523</b>   | 68.067          | 71.505        | 68.262        | 70.370         |
| Persian             | 100           | 3.231        | 3.536      | 3.158        | 3.161          | 67.501          | 74.311        | <b>63.272</b> | 70.124         |
|                     | 500           | 3.256        | 3.533      | 3.238        | 3.286          | 59.253          | 74.221        | 59.199        | 70.545         |
|                     | 1000          | <b>3.274</b> | 3.533      | 3.377        | 3.377          | 58.429          | 73.679        | <b>57.328</b> | 70.419         |
|                     | all           | 3.339        | 3.523      | 3.335        | 3.418          | 58.164          | 72.843        | <b>56.100</b> | 67.585         |
| Polish              | 100           | 4.686        | 10.034     | <b>4.387</b> | 5.003          | 65.963          | <b>63.220</b> | 65.963        | 68.984         |
|                     | 500           | 5.288        | 9.415      | <b>5.106</b> | 5.352          | 68.643          | <b>62.639</b> | 65.950        | 68.579         |
|                     | 1000          | 5.466        | 9.563      | <b>5.256</b> | 5.666          | 68.984          | <b>62.551</b> | 64.800        | 70.071         |
|                     | all           | 6.404        | 8.088      | <b>6.048</b> | 6.537          | 63.802          | <b>60.389</b> | 63.802        | 69.742         |
| Portuguese          | 100           | 3.761        | 4.448      | <b>3.631</b> | 3.827          | 74.216          | <b>63.704</b> | 73.696        | 74.427         |
|                     | 500           | 3.988        | 4.387      | 3.940        | 4.104          | 69.862          | <b>63.477</b> | 67.116        | 73.534         |
|                     | 1000          | 4.059        | 4.393      | 4.016        | 4.094          | 68.952          | <b>63.656</b> | 67.295        | 67.295         |
|                     | all           | 4.288        | 4.382      | <b>4.113</b> | 4.195          | 68.757          | <b>63.672</b> | 65.053        | 67.912         |
| Romanian            | 100           | 7.269        | 5.970      | <b>5.401</b> | 5.401          | 71.105          | 73.095        | 71.311        | 74.674         |
|                     | 500           | 7.269        | 5.961      | 5.936        | 5.936          | <b>69.526</b>   | 74.262        | 70.899        | 80.851         |
|                     | 1000          | 7.269        | 5.961      | 5.936        | 5.936          | <b>69.526</b>   | 74.262        | 70.899        | 80.851         |
|                     | all           | 7.269        | 5.961      | 5.936        | 5.936          | <b>69.526</b>   | 74.262        | 70.899        | 80.851         |
| Slovenian           | 100           | 5.156        | 5.277      | <b>4.600</b> | 4.600          | 81.297          | 69.696        | 69.932        | 78.153         |
|                     | 500           | 5.429        | 5.267      | <b>5.026</b> | 5.026          | 71.231          | <b>69.945</b> | 71.231        | 76.920         |
|                     | 1000          | 5.387        | 5.289      | <b>5.055</b> | 5.055          | 71.588          | 69.629        | 69.804        | 72.713         |
|                     | all           | 5.605        | 5.222      | 5.300        | 5.300          | 70.875          | 67.939        | 66.949        | 73.850         |
| Spanish             | 100           | 3.109        | 3.079      | 3.015        | 3.015          | 67.607          | <b>64.045</b> | 67.607        | 68.688         |
|                     | 500           | 3.114        | 3.082      | 3.034        | 3.034          | 67.898          | <b>62.380</b> | 67.898        | 69.199         |
|                     | 1000          | 3.166        | 3.079      | 3.083        | 3.083          | 64.750          | 63.583        | 64.446        | 63.899         |
|                     | all           | 3.265        | 3.062      | 3.140        | 3.140          | 64.702          | <b>61.213</b> | 62.514        | 62.514         |
| Swedish             | 100           | 5.184        | 5.773      | <b>5.009</b> | 5.009          | 72.166          | <b>68.119</b> | 72.166        | 77.417         |
|                     | 500           | 5.379        | 5.708      | <b>5.225</b> | 5.225          | 70.268          | <b>68.360</b> | 70.268        | 76.056         |
|                     | 1000          | 5.482        | 5.773      | <b>5.277</b> | 5.277          | 68.971          | 68.286        | <b>67.230</b> | 75.218         |
|                     | all           | 5.737        | 5.669      | <b>5.558</b> | 5.558          | 68.878          | 67.425        | 66.619        | 74.935         |
| Tamil               | 100           | 8.289        | 6.988      | <b>6.334</b> | 6.334          | 66.999          | 76.339        | 66.098        | 78.284         |
|                     | 500           | 8.305        | 6.719      | <b>6.205</b> | 6.205          | 66.524          | 76.766        | 67.330        | 72.072         |
|                     | 1000          | 8.305        | 6.719      | <b>6.205</b> | 6.205          | 66.524          | 76.766        | 67.330        | 72.072         |
|                     | all           | 8.305        | 6.719      | <b>6.205</b> | 6.205          | 66.524          | 76.766        | 67.330        | 72.072         |

| Target task         | 4 closest tasks w.r.t. subspace distance (closest first) |               |               |            |
|---------------------|----------------------------------------------------------|---------------|---------------|------------|
| Ancient Greek       | Old Church Slavonic                                      | Latin         | Gothic        | Hungarian  |
| Arabic              | Czech                                                    | Polish        | Persian       | Slovenian  |
| Basque              | Finnish                                                  | Polish        | Czech         | Indonesian |
| Bulgarian           | Czech                                                    | Norwegian     | Finnish       | Slovenian  |
| Croatian            | Estonian                                                 | Slovenian     | Czech         | Finnish    |
| Czech               | Finnish                                                  | Norwegian     | Bulgarian     | Danish     |
| Danish              | Norwegian                                                | Swedish       | English       | Czech      |
| Dutch               | German                                                   | Norwegian     | Danish        | English    |
| English             | Norwegian                                                | Danish        | Italian       | Swedish    |
| Estonian            | Finnish                                                  | Swedish       | Norwegian     | Polish     |
| Finnish             | Estonian                                                 | Czech         | Swedish       | Norwegian  |
| French              | Italian                                                  | Spanish       | German        | English    |
| German              | Dutch                                                    | Swedish       | English       | French     |
| Gothic              | Old Church Slavonic                                      | Latin         | Ancient Greek | Finnish    |
| Greek               | Swedish                                                  | Spanish       | Czech         | German     |
| Hebrew              | Portuguese                                               | Norwegian     | Czech         | Danish     |
| Hindi               | Japanese                                                 | Croatian      | Tamil         | Persian    |
| Hungarian           | Danish                                                   | Ancient Greek | German        | Portuguese |
| Indonesian          | Finnish                                                  | Czech         | Bulgarian     | Norwegian  |
| Irish               | Polish                                                   | Czech         | Greek         | Arabic     |
| Italian             | English                                                  | French        | Spanish       | Dutch      |
| Japanese            | Hindi                                                    | Persian       | Arabic        | Tamil      |
| Latin               | Old Church Slavonic                                      | Ancient Greek | Gothic        | Finnish    |
| Norwegian           | Danish                                                   | English       | Swedish       | Czech      |
| Old Church Slavonic | Latin                                                    | Gothic        | Ancient Greek | Finnish    |
| Persian             | Japanese                                                 | Czech         | Swedish       | Finnish    |
| Polish              | Slovenian                                                | Czech         | Finnish       | Estonian   |
| Portuguese          | Hebrew                                                   | Norwegian     | Italian       | Danish     |
| Romanian            | Finnish                                                  | Estonian      | Norwegian     | Czech      |
| Slovenian           | Polish                                                   | Czech         | Danish        | Swedish    |
| Spanish             | French                                                   | Italian       | Portuguese    | Greek      |
| Swedish             | Danish                                                   | Norwegian     | Finnish       | Estonian   |
| Tamil               | Finnish                                                  | Indonesian    | Basque        | Croatian   |

Table 3: Related tasks used in the UNIDEP experiment. The 4 closest tasks were selected using subspace distance (i.e. Frobenius norm of the difference between the orthogonal projection matrices) between the space spanned by the top 50 left singular vectors of their Hankel matrices. The common basis of prefixes/suffixes ( $\mathcal{P}, \mathcal{S}$ ) for these Hankel matrices was obtained by taking the union of the 100 most frequent prefixes/suffixes for each task.
